# Supplementary material for: The Genome Organization of Thermotoga maritima Reflects Its Lifestyle
Source: PubMed Central journal article supplement (PMC3636130; doi:10.1371/journal.pgen.1003485), 2013-04-25
Supplement: pgen.1003485.s001.pdf [file pgen.1003485.s001.pdf]

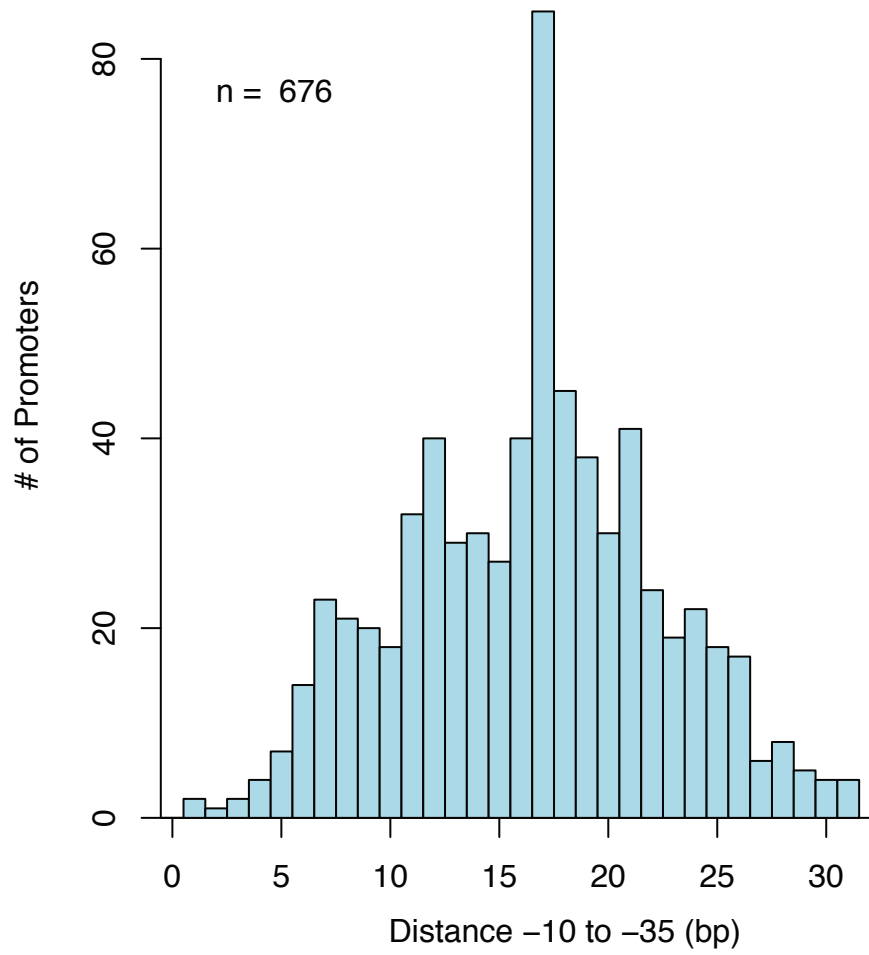

Figure S1
