# Supplementary material for: The Genome Organization of Thermotoga maritima Reflects Its Lifestyle
Source: PLoS Genet. 2013 Apr 25;9(4):e1003485. doi: 10.1371/journal.pgen.1003485 (PMC3636130; doi:10.1371/journal.pgen.1003485)
Supplement: Table S2 — T. maritima transcription unit assembly. (XLSX) [file pgen.1003485.s006.xlsx]

## Sheet: TableS2
Table S2. T. maritima transcription unit assembly.
TU Identifier	Left Coordinate	Right Coordinate	Strand (+/-)	Experimentally Identified TSS (y/n)
TU_P_332_3125	332	3125	+	y
TU_M_3109_7495	3109	7495	-	n
TU_P_7450_8199	7450	8199	+	y
TU_M_8182_11417	8182	11417	-	y
TU_P_11504_17835	11504	17835	+	y
TU_P_13210_16327	13210	16327	+	y
TU_M_17556_19359	17556	19359	-	y
TU_M_19402_32503	19402	32503	-	y
TU_M_29461_31324	29461	31324	-	y
TU_P_32779_34072	32779	34072	+	y
TU_P_34088_35195	34088	35195	+	n
TU_P_35196_37242	35196	37242	+	y
TU_P_35196_36767	35196	36767	+	y
TU_P_37226_41011	37226	41011	+	y
TU_M_40700_43755	40700	43755	-	y
TU_P_43795_44410	43795	44410	+	y
TU_P_43795_44755	43795	44755	+	y
TU_M_44410_46228	44410	46228	-	y
TU_P_47140_51043	47140	51043	+	y
TU_P_51012_51844	51012	51844	+	y
TU_M_51501_55693	51501	55693	-	n
TU_M_53685_55693	53685	55693	-	n
TU_M_55699_59893	55699	59893	-	y
TU_P_60118_63338	60118	63338	+	y
TU_P_63339_63939	63339	63939	+	y
TU_M_63945_65825	63945	65825	-	y
TU_P_65841_71055	65841	71055	+	y
TU_M_71048_72121	71048	72121	-	y
TU_P_72285_74237	72285	74237	+	y
TU_P_74238_81552	74238	81552	+	n
TU_M_81282_84166	81282	84166	-	n
TU_M_83104_84166	83104	84166	-	n
TU_M_84123_84323	84123	84323	-	n
TU_M_84319_89009	84319	89009	-	y
TU_P_89023_90592	89023	90592	+	y
TU_M_90316_99595	90316	99595	-	y
TU_M_99584_105208	99584	105208	-	y
TU_M_100461_105208	100461	105208	-	y
TU_P_105230_108206	105230	108206	+	y
TU_P_108207_111781	108207	111781	+	n
TU_M_111477_112941	111477	112941	-	y
TU_P_112942_115856	112942	115856	+	y
TU_P_115830_123932	115830	123932	+	y
TU_P_115830_120900	115830	120900	+	y
TU_M_123954_124686	123954	124686	-	y
TU_P_124772_128835	124772	128835	+	y
TU_M_128772_129991	128772	129991	-	n
TU_P_130111_130491	130111	130491	+	n
TU_P_130466_132804	130466	132804	+	y
TU_P_132803_134441	132803	134441	+	y
TU_M_134175_136729	134175	136729	-	y
TU_P_136751_137933	136751	137933	+	y
TU_P_138354_140557	138354	140557	+	y
TU_P_139150_140557	139150	140557	+	n
TU_M_140518_141766	140518	141766	-	n
TU_P_141800_142814	141800	142814	+	n
TU_M_142809_149076	142809	149076	-	y
TU_M_142809_150464	142809	150464	-	y
TU_P_150531_150925	150531	150925	+	y
TU_M_150882_156978	150882	156978	-	y
TU_M_156191_156475	156191	156475	-	y
TU_P_157486_158172	157486	158172	+	y
TU_M_158180_160088	158180	160088	-	y
TU_P_160231_161916	160231	161916	+	n
TU_M_161854_163281	161854	163281	-	y
TU_M_163327_163793	163327	163793	-	y
TU_P_163816_165081	163816	165081	+	y
TU_M_164813_165509	164813	165509	-	y
TU_P_165577_170969	165577	170969	+	y
TU_M_170849_173905	170849	173905	-	y
TU_P_173953_184489	173953	184489	+	y
TU_P_184507_188774	184507	188774	+	y
TU_P_188806_193989	188806	193989	+	y
TU_P_193990_194286	193990	194286	+	y
TU_M_194297_194896	194297	194896	-	y
TU_P_194950_199232	194950	199232	+	y
TU_M_199076_200765	199076	200765	-	y
TU_M_199076_202060	199076	202060	-	y
TU_P_202300_202396	202300	202396	+	y
TU_P_202418_205790	202418	205790	+	y
TU_M_205784_206136	205784	206136	-	y
TU_M_206137_206233	206137	206233	-	y
TU_M_206234_206320	206234	206320	-	y
TU_M_206321_206408	206321	206408	-	y
TU_M_206409_206504	206409	206504	-	y
TU_M_206535_208045	206535	208045	-	y
TU_P_208032_208122	208032	208122	+	y
TU_P_208139_208212	208139	208212	+	n
TU_M_208150_209123	208150	209123	-	y
TU_P_209047_209570	209047	209570	+	y
TU_M_209560_210517	209560	210517	-	y
TU_P_210669_213280	210669	213280	+	y
TU_P_213103_214471	213103	214471	+	y
TU_P_214325_215530	214325	215530	+	y
TU_P_215569_217373	215569	217373	+	y
TU_P_217358_219806	217358	219806	+	y
TU_P_217358_218454	217358	218454	+	y
TU_M_219645_225690	219645	225690	-	y
TU_M_221901_225690	221901	225690	-	y
TU_P_225682_233620	225682	233620	+	y
TU_M_233241_238035	233241	238035	-	y
TU_P_238068_239236	238068	239236	+	y
TU_M_239044_239778	239044	239778	-	y
TU_P_239794_243612	239794	243612	+	n
TU_P_241460_243612	241460	243612	+	y
TU_P_243650_245305	243650	245305	+	y
TU_P_244513_245305	244513	245305	+	y
TU_M_244735_246381	244735	246381	-	y
TU_M_246324_253389	246324	253389	-	y
TU_P_253378_277017	253378	277017	+	y
TU_P_253378_256529	253378	256529	+	y
TU_P_265284_265660	265284	265660	+	y
TU_P_277041_277369	277041	277369	+	y
TU_M_277384_282590	277384	282590	-	n
TU_P_282507_289783	282507	289783	+	y
TU_P_283812_286488	283812	286488	+	y
TU_M_289793_291312	289793	291312	-	y
TU_P_291436_292786	291436	292786	+	y
TU_P_291436_294664	291436	294664	+	y
TU_P_294707_298076	294707	298076	+	n
TU_P_298075_306722	298075	306722	+	y
TU_P_298075_299175	298075	299175	+	y
TU_M_306694_307991	306694	307991	-	y
TU_P_308135_313364	308135	313364	+	n
TU_M_313379_314059	313379	314059	-	y
TU_M_314060_315119	314060	315119	-	y
TU_P_315172_317425	315172	317425	+	y
TU_M_316980_318053	316980	318053	-	n
TU_P_318239_320100	318239	320100	+	n
TU_P_320102_328906	320102	328906	+	n
TU_M_328904_331210	328904	331210	-	n
TU_P_331494_333517	331494	333517	+	y
TU_P_333520_335599	333520	335599	+	n
TU_P_335628_336170	335628	336170	+	y
TU_P_336171_338168	336171	338168	+	y
TU_M_338163_338411	338163	338411	-	y
TU_P_338423_342292	338423	342292	+	y
TU_P_341991_342292	341991	342292	+	y
TU_M_342138_342805	342138	342805	-	y
TU_P_342885_343931	342885	343931	+	y
TU_P_343955_348381	343955	348381	+	n
TU_P_348401_348482	348401	348482	+	y
TU_P_348472_349475	348472	349475	+	n
TU_M_349320_358068	349320	358068	-	y
TU_M_358106_358423	358106	358423	-	y
TU_P_358589_360955	358589	360955	+	y
TU_P_361139_368557	361139	368557	+	y
TU_M_367885_368566	367885	368566	-	n
TU_P_369162_369672	369162	369672	+	y
TU_M_369806_375044	369806	375044	-	y
TU_P_375151_377537	375151	377537	+	y
TU_M_377535_378638	377535	378638	-	n
TU_P_378660_379426	378660	379426	+	n
TU_M_379043_379482	379043	379482	-	y
TU_P_379428_387251	379428	387251	+	n
TU_P_379428_386043	379428	386043	+	n
TU_M_387238_388430	387238	388430	-	n
TU_M_387238_387722	387238	387722	-	y
TU_P_388543_389200	388543	389200	+	n
TU_M_388694_392054	388694	392054	-	y
TU_P_392240_394539	392240	394539	+	y
TU_M_394539_395169	394539	395169	-	y
TU_M_394539_395967	394539	395967	-	n
TU_P_396560_397067	396560	397067	+	y
TU_P_397216_400041	397216	400041	+	y
TU_P_398281_400041	398281	400041	+	y
TU_P_399660_401681	399660	401681	+	y
TU_P_399660_400041	399660	400041	+	y
TU_M_401363_402044	401363	402044	-	y
TU_P_402073_405194	402073	405194	+	n
TU_P_402672_405194	402672	405194	+	y
TU_P_405218_406316	405218	406316	+	y
TU_M_406112_409217	406112	409217	-	n
TU_M_409245_411008	409245	411008	-	y
TU_P_411545_413947	411545	413947	+	y
TU_M_413935_419099	413935	419099	-	y
TU_M_419256_419349	419256	419349	-	y
TU_P_419434_421402	419434	421402	+	y
TU_M_421044_421879	421044	421879	-	y
TU_P_422155_423836	422155	423836	+	y
TU_P_423969_428699	423969	428699	+	y
TU_P_425205_428699	425205	428699	+	y
TU_P_428782_434710	428782	434710	+	n
TU_P_434753_437017	434753	437017	+	y
TU_P_434753_440970	434753	440970	+	y
TU_M_440464_441886	440464	441886	-	y
TU_M_442085_453676	442085	453676	-	n
TU_M_448588_450595	448588	450595	-	n
TU_M_452139_453676	452139	453676	-	n
TU_P_453854_454999	453854	454999	+	n
TU_P_453854_466645	453854	466645	+	n
TU_P_455022_456482	455022	456482	+	n
TU_P_459448_463015	459448	463015	+	y
TU_P_462963_466645	462963	466645	+	n
TU_M_466363_469153	466363	469153	-	y
TU_M_466363_473677	466363	473677	-	y
TU_P_473921_474017	473921	474017	+	y
TU_P_474099_474399	474099	474399	+	y
TU_P_474400_474565	474400	474565	+	y
TU_P_474555_474627	474555	474627	+	n
TU_P_474631_478250	474631	478250	+	y
TU_P_478290_487325	478290	487325	+	y
TU_M_487306_489214	487306	489214	-	y
TU_M_489215_502649	489215	502649	-	n
TU_M_494600_495412	494600	495412	-	y
TU_M_497084_502649	497084	502649	-	n
TU_M_502650_502751	502650	502751	-	y
TU_M_502791_504106	502791	504106	-	y
TU_M_504107_505348	504107	505348	-	y
TU_M_505349_506832	505349	506832	-	n
TU_M_506852_510810	506852	510810	-	y
TU_M_510811_510885	510811	510885	-	y
TU_M_510886_510988	510886	510988	-	y
TU_M_510989_511067	510989	511067	-	y
TU_P_511145_515434	511145	515434	+	y
TU_M_515286_518082	515286	518082	-	y
TU_M_516041_518082	516041	518082	-	y
TU_P_518114_519371	518114	519371	+	y
TU_M_519192_521071	519192	521071	-	y
TU_P_520945_523441	520945	523441	+	y
TU_M_523182_531606	523182	531606	-	y
TU_P_531690_532059	531690	532059	+	y
TU_P_532196_534182	532196	534182	+	y
TU_M_534317_538188	534317	538188	-	y
TU_M_535987_538188	535987	538188	-	y
TU_P_538182_538958	538182	538958	+	n
TU_M_538557_541944	538557	541944	-	y
TU_P_541966_544751	541966	544751	+	y
TU_P_544511_544751	544511	544751	+	y
TU_M_544692_546759	544692	546759	-	y
TU_P_546811_560735	546811	560735	+	y
TU_P_555148_556940	555148	556940	+	y
TU_P_560806_563985	560806	563985	+	n
TU_M_563752_565907	563752	565907	-	y
TU_P_565921_568653	565921	568653	+	y
TU_M_568281_574405	568281	574405	-	y
TU_P_574537_585537	574537	585537	+	y
TU_M_585389_590033	585389	590033	-	y
TU_P_590961_591639	590961	591639	+	y
TU_P_591660_592795	591660	592795	+	y
TU_M_592759_593317	592759	593317	-	n
TU_P_593333_596592	593333	596592	+	y
TU_P_593333_594005	593333	594005	+	y
TU_P_596327_596592	596327	596592	+	y
TU_M_596445_600212	596445	600212	-	y
TU_P_600272_601743	600272	601743	+	y
TU_P_601764_605412	601764	605412	+	y
TU_P_605441_610135	605441	610135	+	y
TU_M_609898_611361	609898	611361	-	y
TU_P_611421_611580	611421	611580	+	y
TU_P_611583_612827	611583	612827	+	n
TU_P_612612_616488	612612	616488	+	y
TU_P_612612_615158	612612	615158	+	y
TU_P_616452_617882	616452	617882	+	y
TU_M_617678_622047	617678	622047	-	y
TU_P_622081_625870	622081	625870	+	y
TU_P_622081_624084	622081	624084	+	y
TU_M_625533_629237	625533	629237	-	y
TU_M_627038_629237	627038	629237	-	y
TU_M_627841_629237	627841	629237	-	y
TU_M_629300_630597	629300	630597	-	y
TU_P_630634_637380	630634	637380	+	n
TU_M_636930_637342	636930	637342	-	y
TU_P_637385_639010	637385	639010	+	y
TU_P_637871_639010	637871	639010	+	y
TU_M_638999_639392	638999	639392	-	y
TU_P_639410_644647	639410	644647	+	y
TU_P_643629_644647	643629	644647	+	y
TU_M_644335_645587	644335	645587	-	n
TU_P_645794_647335	645794	647335	+	y
TU_M_647968_652021	647968	652021	-	y
TU_M_652035_657605	652035	657605	-	y
TU_M_654843_657605	654843	657605	-	y
TU_M_657606_668524	657606	668524	-	y
TU_M_662503_668524	662503	668524	-	y
TU_M_668412_669932	668412	669932	-	y
TU_P_670065_677745	670065	677745	+	y
TU_M_677741_680550	677741	680550	-	y
TU_M_677741_679671	677741	679671	-	n
TU_P_680582_682591	680582	682591	+	y
TU_P_681923_682591	681923	682591	+	n
TU_M_682424_683975	682424	683975	-	y
TU_M_683921_686101	683921	686101	-	y
TU_M_686138_688042	686138	688042	-	y
TU_P_688239_689402	688239	689402	+	y
TU_P_689109_689402	689109	689402	+	y
TU_P_689484_691299	689484	691299	+	y
TU_M_691244_691514	691244	691514	-	y
TU_M_691515_693188	691515	693188	-	y
TU_M_693343_694948	693343	694948	-	y
TU_P_695057_697060	695057	697060	+	y
TU_M_696752_698087	696752	698087	-	n
TU_P_698153_708220	698153	708220	+	n
TU_M_707874_708731	707874	708731	-	y
TU_P_708733_711042	708733	711042	+	y
TU_M_710616_711424	710616	711424	-	y
TU_P_711420_716303	711420	716303	+	y
TU_P_713232_714279	713232	714279	+	y
TU_P_714280_716303	714280	716303	+	n
TU_P_716311_720105	716311	720105	+	y
TU_M_720112_726175	720112	726175	-	y
TU_M_721797_726175	721797	726175	-	y
TU_P_726194_727289	726194	727289	+	y
TU_M_727043_730637	727043	730637	-	y
TU_P_730398_748574	730398	748574	+	y
TU_P_732957_748574	732957	748574	+	y
TU_M_748077_749293	748077	749293	-	y
TU_P_749355_752892	749355	752892	+	n
TU_P_752891_753239	752891	753239	+	y
TU_P_753250_762909	753250	762909	+	y
TU_M_762458_774336	762458	774336	-	y
TU_P_774351_774452	774351	774452	+	y
TU_M_774434_775909	774434	775909	-	y
TU_M_775947_778944	775947	778944	-	y
TU_M_778946_784791	778946	784791	-	y
TU_M_784823_786072	784823	786072	-	y
TU_P_786149_790370	786149	790370	+	y
TU_P_789471_790370	789471	790370	+	y
TU_M_790250_792634	790250	792634	-	y
TU_P_792714_794769	792714	794769	+	y
TU_M_794580_798625	794580	798625	-	y
TU_M_795335_798625	795335	798625	-	y
TU_P_798661_803118	798661	803118	+	y
TU_P_800967_803118	800967	803118	+	y
TU_M_803062_804742	803062	804742	-	n
TU_M_803062_806323	803062	806323	-	y
TU_P_806129_807964	806129	807964	+	y
TU_P_806666_807964	806666	807964	+	y
TU_P_806902_807964	806902	807964	+	y
TU_P_807965_808115	807965	808115	+	n
TU_P_808105_808665	808105	808665	+	y
TU_M_808681_809895	808681	809895	-	y
TU_P_809937_810094	809937	810094	+	y
TU_P_810112_817625	810112	817625	+	y
TU_P_814086_817625	814086	817625	+	n
TU_M_817286_818156	817286	818156	-	n
TU_P_818128_820000	818128	820000	+	y
TU_M_819712_823818	819712	823818	-	y
TU_P_823917_830370	823917	830370	+	y
TU_P_830477_831188	830477	831188	+	n
TU_P_831295_838994	831295	838994	+	y
TU_P_833798_835060	833798	835060	+	n
TU_M_838937_840337	838937	840337	-	n
TU_P_840417_842924	840417	842924	+	y
TU_P_842925_843040	842925	843040	+	y
TU_P_843037_843804	843037	843804	+	n
TU_P_843805_846300	843805	846300	+	n
TU_P_845077_846300	845077	846300	+	y
TU_P_846297_846395	846297	846395	+	y
TU_P_846421_849810	846421	849810	+	n
TU_M_849810_851883	849810	851883	-	n
TU_M_851884_852910	851884	852910	-	y
TU_P_853011_853867	853011	853867	+	y
TU_P_853824_859613	853824	859613	+	y
TU_P_853824_866425	853824	866425	+	y
TU_P_866425_870677	866425	870677	+	n
TU_P_870670_874516	870670	874516	+	y
TU_M_874266_877068	874266	877068	-	n
TU_P_877169_877270	877169	877270	+	y
TU_P_877271_885983	877271	885983	+	n
TU_P_882824_885983	882824	885983	+	y
TU_M_885994_887082	885994	887082	-	y
TU_P_887121_891989	887121	891989	+	y
TU_P_890300_891989	890300	891989	+	y
TU_M_891928_894870	891928	894870	-	y
TU_M_893680_894870	893680	894870	-	y
TU_P_895086_897491	895086	897491	+	y
TU_M_897318_905718	897318	905718	-	y
TU_M_899540_900878	899540	900878	-	y
TU_M_903438_905718	903438	905718	-	y
TU_P_905718_908041	905718	908041	+	y
TU_M_907614_910768	907614	910768	-	y
TU_P_910783_920085	910783	920085	+	y
TU_P_916901_920085	916901	920085	+	n
TU_M_920240_934631	920240	934631	-	y
TU_M_929641_931687	929641	931687	-	n
TU_M_931681_934631	931681	934631	-	y
TU_P_934935_944461	934935	944461	+	n
TU_P_935878_942625	935878	942625	+	y
TU_M_944181_945704	944181	945704	-	n
TU_M_945705_945926	945705	945926	-	y
TU_M_945927_948937	945927	948937	-	y
TU_P_948974_950000	948974	950000	+	n
TU_M_949663_951029	949663	951029	-	y
TU_P_950943_954007	950943	954007	+	y
TU_M_953835_955052	953835	955052	-	y
TU_P_955092_961410	955092	961410	+	y
TU_P_956346_958844	956346	958844	+	n
TU_P_958856_960424	958856	960424	+	y
TU_M_961130_962632	961130	962632	-	y
TU_P_962686_963852	962686	963852	+	y
TU_M_963535_964305	963535	964305	-	y
TU_P_964335_965005	964335	965005	+	n
TU_M_964849_966022	964849	966022	-	y
TU_M_966023_975764	966023	975764	-	n
TU_M_975765_976805	975765	976805	-	n
TU_P_978345_979644	978345	979644	+	y
TU_M_979648_981339	979648	981339	-	y
TU_P_981411_984299	981411	984299	+	n
TU_M_984361_985167	984361	985167	-	y
TU_P_985203_986101	985203	986101	+	n
TU_M_985616_986330	985616	986330	-	n
TU_P_986531_988091	986531	988091	+	y
TU_M_988421_991400	988421	991400	-	y
TU_M_991381_993745	991381	993745	-	y
TU_P_993896_999840	993896	999840	+	n
TU_P_999858_1009961	999858	1009961	+	y
TU_M_1009399_1011664	1009399	1011664	-	n
TU_M_1009399_1015784	1009399	1015784	-	y
TU_M_1017105_1018818	1017105	1018818	-	n
TU_M_1018875_1019790	1018875	1019790	-	y
TU_M_1020397_1021701	1020397	1021701	-	n
TU_M_1020397_1023571	1020397	1023571	-	y
TU_P_1023675_1027625	1023675	1027625	+	n
TU_P_1025850_1027625	1025850	1027625	+	n
TU_M_1027238_1028333	1027238	1028333	-	y
TU_P_1028431_1033316	1028431	1033316	+	y
TU_P_1031480_1033316	1031480	1033316	+	y
TU_M_1033308_1034620	1033308	1034620	-	n
TU_P_1034706_1035305	1034706	1035305	+	y
TU_M_1035004_1042445	1035004	1042445	-	n
TU_M_1036063_1042445	1036063	1042445	-	n
TU_M_1040250_1042445	1040250	1042445	-	n
TU_P_1042512_1048547	1042512	1048547	+	n
TU_P_1042512_1043729	1042512	1043729	+	n
TU_P_1043055_1043729	1043055	1043729	+	y
TU_P_1044349_1046178	1044349	1046178	+	y
TU_P_1046208_1048547	1046208	1048547	+	n
TU_M_1048531_1048825	1048531	1048825	-	y
TU_P_1048919_1050329	1048919	1050329	+	y
TU_M_1049495_1051043	1049495	1051043	-	y
TU_P_1051059_1052496	1051059	1052496	+	y
TU_M_1051930_1060495	1051930	1060495	-	y
TU_M_1051930_1055495	1051930	1055495	-	n
TU_P_1060819_1062181	1060819	1062181	+	y
TU_M_1061908_1062957	1061908	1062957	-	y
TU_P_1062992_1068484	1062992	1068484	+	y
TU_P_1062992_1069836	1062992	1069836	+	y
TU_P_1067846_1068484	1067846	1068484	+	y
TU_M_1069454_1070917	1069454	1070917	-	y
TU_P_1071005_1072661	1071005	1072661	+	n
TU_M_1072656_1072955	1072656	1072955	-	y
TU_M_1072656_1074337	1072656	1074337	-	y
TU_M_1074338_1077296	1074338	1077296	-	n
TU_M_1077297_1083479	1077297	1083479	-	n
TU_M_1083665_1085900	1083665	1085900	-	n
TU_P_1085943_1092751	1085943	1092751	+	n
TU_M_1092228_1102239	1092228	1102239	-	y
TU_P_1102147_1118726	1102147	1118726	+	y
TU_P_1102147_1124359	1102147	1124359	+	y
TU_P_1118641_1124359	1118641	1124359	+	y
TU_M_1123533_1125170	1123533	1125170	-	y
TU_M_1124577_1124849	1124577	1124849	-	y
TU_M_1124850_1125170	1124850	1125170	-	y
TU_P_1125286_1126925	1125286	1126925	+	n
TU_P_1126964_1127671	1126964	1127671	+	n
TU_P_1127703_1131595	1127703	1131595	+	n
TU_M_1131699_1132766	1131699	1132766	-	y
TU_P_1132899_1136259	1132899	1136259	+	n
TU_P_1132899_1134295	1132899	1134295	+	n
TU_M_1135968_1141096	1135968	1141096	-	y
TU_M_1135968_1138259	1135968	1138259	-	y
TU_P_1141114_1142577	1141114	1142577	+	y
TU_P_1141114_1141650	1141114	1141650	+	y
TU_M_1142095_1144471	1142095	1144471	-	y
TU_P_1144572_1148052	1144572	1148052	+	y
TU_P_1148054_1153485	1148054	1153485	+	y
TU_P_1148054_1154214	1148054	1154214	+	y
TU_P_1148054_1149245	1148054	1149245	+	y
TU_P_1154140_1154889	1154140	1154889	+	y
TU_M_1154910_1158336	1154910	1158336	-	y
TU_P_1158478_1161300	1158478	1161300	+	y
TU_P_1161235_1162465	1161235	1162465	+	y
TU_M_1162486_1170073	1162486	1170073	-	y
TU_M_1163530_1165063	1163530	1165063	-	y
TU_M_1167900_1170073	1167900	1170073	-	y
TU_P_1170135_1172300	1170135	1172300	+	n
TU_M_1172584_1175971	1172584	1175971	-	y
TU_M_1174547_1175971	1174547	1175971	-	y
TU_P_1176082_1180960	1176082	1180960	+	y
TU_P_1176082_1181827	1176082	1181827	+	y
TU_P_1178198_1180960	1178198	1180960	+	y
TU_P_1181828_1182600	1181828	1182600	+	y
TU_P_1182602_1185119	1182602	1185119	+	y
TU_M_1185128_1188332	1185128	1188332	-	y
TU_P_1188354_1189699	1188354	1189699	+	y
TU_M_1189563_1191568	1189563	1191568	-	y
TU_M_1191633_1198230	1191633	1198230	-	y
TU_P_1198270_1201974	1198270	1201974	+	y
TU_P_1198270_1199510	1198270	1199510	+	y
TU_P_1201346_1201974	1201346	1201974	+	n
TU_M_1201779_1203035	1201779	1203035	-	y
TU_P_1202957_1204077	1202957	1204077	+	y
TU_P_1204158_1204243	1204158	1204243	+	y
TU_P_1204465_1207105	1204465	1207105	+	n
TU_M_1207128_1221880	1207128	1221880	-	n
TU_M_1219947_1221880	1219947	1221880	-	n
TU_M_1221989_1230346	1221989	1230346	-	y
TU_M_1229110_1230346	1229110	1230346	-	y
TU_P_1230601_1241196	1230601	1241196	+	n
TU_M_1241220_1247748	1241220	1247748	-	y
TU_M_1246029_1247748	1246029	1247748	-	y
TU_M_1247749_1253731	1247749	1253731	-	y
TU_M_1253741_1254726	1253741	1254726	-	n
TU_M_1254624_1263610	1254624	1263610	-	n
TU_M_1262295_1263610	1262295	1263610	-	n
TU_P_1263703_1264786	1263703	1264786	+	y
TU_M_1264715_1268637	1264715	1268637	-	n
TU_P_1268756_1268850	1268756	1268850	+	y
TU_P_1268929_1280494	1268929	1280494	+	y
TU_P_1276737_1280494	1276737	1280494	+	n
TU_M_1279766_1280598	1279766	1280598	-	y
TU_P_1280661_1285640	1280661	1285640	+	y
TU_M_1285330_1290953	1285330	1290953	-	y
TU_P_1291151_1292349	1291151	1292349	+	n
TU_P_1292403_1296620	1292403	1296620	+	y
TU_M_1296623_1297153	1296623	1297153	-	y
TU_P_1297328_1300998	1297328	1300998	+	y
TU_P_1301056_1302456	1301056	1302456	+	y
TU_M_1302451_1307125	1302451	1307125	-	n
TU_P_1307130_1312917	1307130	1312917	+	y
TU_M_1313032_1315307	1313032	1315307	-	n
TU_P_1315425_1315962	1315425	1315962	+	y
TU_M_1315625_1319086	1315625	1319086	-	y
TU_M_1319150_1319890	1319150	1319890	-	y
TU_P_1319810_1322790	1319810	1322790	+	y
TU_M_1322803_1323482	1322803	1323482	-	y
TU_P_1323561_1324520	1323561	1324520	+	n
TU_M_1324304_1324900	1324304	1324900	-	n
TU_P_1325056_1325305	1325056	1325305	+	y
TU_P_1325260_1332643	1325260	1332643	+	n
TU_M_1332367_1333259	1332367	1333259	-	n
TU_M_1333262_1333888	1333262	1333888	-	n
TU_M_1333890_1334943	1333890	1334943	-	n
TU_P_1335117_1335322	1335117	1335322	+	y
TU_P_1335323_1335489	1335323	1335489	+	n
TU_P_1335323_1340480	1335323	1340480	+	n
TU_M_1340376_1340908	1340376	1340908	-	n
TU_M_1340376_1342505	1340376	1342505	-	n
TU_P_1342640_1351079	1342640	1351079	+	n
TU_P_1342640_1347110	1342640	1347110	+	n
TU_M_1350908_1352525	1350908	1352525	-	n
TU_P_1352673_1358256	1352673	1358256	+	n
TU_M_1358278_1359265	1358278	1359265	-	y
TU_M_1359532_1359891	1359532	1359891	-	n
TU_P_1359926_1362191	1359926	1362191	+	y
TU_M_1362206_1362320	1362206	1362320	-	y
TU_P_1362406_1362484	1362406	1362484	+	y
TU_P_1362534_1362878	1362534	1362878	+	y
TU_P_1362534_1367863	1362534	1367863	+	y
TU_M_1367499_1376128	1367499	1376128	-	y
TU_M_1368785_1376128	1368785	1376128	-	y
TU_P_1376151_1385246	1376151	1385246	+	y
TU_P_1378821_1384150	1378821	1384150	+	n
TU_P_1384142_1385246	1384142	1385246	+	y
TU_M_1385175_1385640	1385175	1385640	-	n
TU_M_1385641_1385745	1385641	1385745	-	y
TU_P_1385838_1390921	1385838	1390921	+	y
TU_M_1390604_1391721	1390604	1391721	-	y
TU_P_1391619_1402359	1391619	1402359	+	y
TU_P_1392399_1392472	1392399	1392472	+	y
TU_P_1392476_1393989	1392476	1393989	+	y
TU_P_1392476_1403867	1392476	1403867	+	y
TU_P_1396224_1399930	1396224	1399930	+	y
TU_P_1399935_1402359	1399935	1402359	+	n
TU_M_1403836_1403929	1403836	1403929	-	y
TU_P_1404057_1404170	1404057	1404170	+	y
TU_M_1404132_1405188	1404132	1405188	-	y
TU_P_1405224_1409642	1405224	1409642	+	y
TU_M_1409297_1415182	1409297	1415182	-	y
TU_M_1414479_1415182	1414479	1415182	-	y
TU_P_1415290_1417404	1415290	1417404	+	y
TU_M_1417362_1417598	1417362	1417598	-	y
TU_P_1417641_1419466	1417641	1419466	+	n
TU_P_1419489_1421158	1419489	1421158	+	y
TU_M_1420631_1426392	1420631	1426392	-	y
TU_P_1426320_1428095	1426320	1428095	+	n
TU_M_1427715_1428089	1427715	1428089	-	n
TU_M_1428451_1435373	1428451	1435373	-	y
TU_M_1430948_1431032	1430948	1431032	-	y
TU_M_1431033_1432755	1431033	1432755	-	y
TU_M_1432756_1434135	1432756	1434135	-	n
TU_M_1434136_1435373	1434136	1435373	-	y
TU_P_1435530_1443441	1435530	1443441	+	y
TU_P_1438458_1443441	1438458	1443441	+	y
TU_P_1443453_1451747	1443453	1451747	+	n
TU_P_1445346_1448223	1445346	1448223	+	y
TU_P_1448260_1451747	1448260	1451747	+	y
TU_M_1451530_1455306	1451530	1455306	-	n
TU_P_1455467_1467945	1455467	1467945	+	y
TU_M_1467962_1477861	1467962	1477861	-	y
TU_M_1470924_1473312	1470924	1473312	-	y
TU_M_1475808_1476281	1475808	1476281	-	n
TU_M_1476278_1476444	1476278	1476444	-	y
TU_P_1477883_1478496	1477883	1478496	+	y
TU_P_1478751_1480720	1478751	1480720	+	n
TU_M_1480150_1503116	1480150	1503116	-	y
TU_M_1483659_1503116	1483659	1503116	-	y
TU_M_1498859_1500111	1498859	1500111	-	y
TU_M_1503130_1503593	1503130	1503593	-	n
TU_P_1503601_1506070	1503601	1506070	+	y
TU_P_1506076_1509608	1506076	1509608	+	y
TU_P_1506076_1508343	1506076	1508343	+	y
TU_P_1507482_1508343	1507482	1508343	+	y
TU_M_1509400_1519028	1509400	1519028	-	n
TU_M_1510725_1519028	1510725	1519028	-	n
TU_M_1519058_1519268	1519058	1519268	-	n
TU_P_1519889_1520533	1519889	1520533	+	n
TU_P_1520417_1522264	1520417	1522264	+	n
TU_P_1522309_1531561	1522309	1531561	+	y
TU_M_1522534_1523288	1522534	1523288	-	y
TU_P_1529461_1530075	1529461	1530075	+	n
TU_P_1530112_1531561	1530112	1531561	+	y
TU_M_1531379_1540395	1531379	1540395	-	y
TU_M_1534106_1540395	1534106	1540395	-	y
TU_M_1536824_1536896	1536824	1536896	-	n
TU_P_1540433_1544670	1540433	1544670	+	y
TU_M_1544389_1545343	1544389	1545343	-	y
TU_P_1545379_1554712	1545379	1554712	+	y
TU_P_1554952_1560015	1554952	1560015	+	y
TU_M_1559852_1561758	1559852	1561758	-	y
TU_P_1561768_1569661	1561768	1569661	+	y
TU_P_1568454_1569661	1568454	1569661	+	y
TU_M_1569357_1570575	1569357	1570575	-	y
TU_P_1570506_1573950	1570506	1573950	+	y
TU_P_1571530_1573359	1571530	1573359	+	n
TU_P_1573362_1573950	1573362	1573950	+	n
TU_M_1573725_1575917	1573725	1575917	-	y
TU_P_1575659_1576925	1575659	1576925	+	y
TU_P_1576926_1577125	1576926	1577125	+	y
TU_M_1577163_1580119	1577163	1580119	-	y
TU_P_1580352_1580436	1580352	1580436	+	n
TU_P_1580437_1580531	1580437	1580531	+	y
TU_P_1580532_1580617	1580532	1580617	+	y
TU_P_1580619_1580747	1580619	1580747	+	y
TU_P_1580748_1582651	1580748	1582651	+	n
TU_M_1582445_1587964	1582445	1587964	-	y
TU_P_1587823_1594518	1587823	1594518	+	y
TU_P_1589078_1590810	1589078	1590810	+	y
TU_P_1590773_1592455	1590773	1592455	+	n
TU_P_1592449_1594518	1592449	1594518	+	n
TU_M_1594175_1595638	1594175	1595638	-	y
TU_M_1594965_1595638	1594965	1595638	-	y
TU_M_1595597_1605001	1595597	1605001	-	y
TU_M_1597001_1597724	1597001	1597724	-	y
TU_M_1598221_1605001	1598221	1605001	-	y
TU_M_1604948_1611723	1604948	1611723	-	y
TU_P_1611776_1614171	1611776	1614171	+	y
TU_M_1613992_1619218	1613992	1619218	-	y
TU_M_1615098_1619218	1615098	1619218	-	y
TU_P_1618997_1635181	1618997	1635181	+	y
TU_M_1631254_1632106	1631254	1632106	-	n
TU_M_1634878_1640635	1634878	1640635	-	y
TU_M_1634878_1653387	1634878	1653387	-	y
TU_M_1644549_1645414	1644549	1645414	-	y
TU_M_1646135_1647687	1646135	1647687	-	y
TU_P_1653465_1655045	1653465	1655045	+	n
TU_M_1655074_1655884	1655074	1655884	-	y
TU_M_1655990_1656096	1655990	1656096	-	y
TU_P_1656242_1656338	1656242	1656338	+	y
TU_M_1656265_1657771	1656265	1657771	-	y
TU_P_1657805_1661786	1657805	1661786	+	y
TU_P_1658525_1661786	1658525	1661786	+	y
TU_P_1659922_1661786	1659922	1661786	+	y
TU_M_1661337_1662371	1661337	1662371	-	n
TU_M_1662356_1662822	1662356	1662822	-	y
TU_M_1662844_1664607	1662844	1664607	-	n
TU_P_1664773_1665753	1664773	1665753	+	y
TU_P_1664773_1665082	1664773	1665082	+	y
TU_M_1665769_1673200	1665769	1673200	-	n
TU_P_1673262_1679230	1673262	1679230	+	y
TU_M_1678921_1679725	1678921	1679725	-	n
TU_P_1679772_1681712	1679772	1681712	+	y
TU_P_1681159_1681712	1681159	1681712	+	n
TU_M_1681362_1690712	1681362	1690712	-	y
TU_M_1681362_1692434	1681362	1692434	-	n
TU_M_1683185_1688390	1683185	1688390	-	n
TU_P_1692213_1695582	1692213	1695582	+	y
TU_M_1695143_1698210	1695143	1698210	-	y
TU_P_1698243_1700308	1698243	1700308	+	y
TU_P_1700223_1701469	1700223	1701469	+	y
TU_M_1701355_1702217	1701355	1702217	-	y
TU_P_1702285_1706577	1702285	1706577	+	y
TU_P_1705301_1706577	1705301	1706577	+	y
TU_P_1706606_1719161	1706606	1719161	+	y
TU_P_1710099_1713284	1710099	1713284	+	n
TU_P_1714681_1715604	1714681	1715604	+	n
TU_M_1718938_1719892	1718938	1719892	-	y
TU_P_1719928_1721723	1719928	1721723	+	n
TU_P_1721917_1729814	1721917	1729814	+	y
TU_P_1721917_1723879	1721917	1723879	+	y
TU_P_1730114_1736483	1730114	1736483	+	n
TU_P_1734074_1736483	1734074	1736483	+	n
TU_P_1736484_1736589	1736484	1736589	+	y
TU_M_1736584_1738648	1736584	1738648	-	n
TU_P_1738633_1740651	1738633	1740651	+	y
TU_P_1740652_1744672	1740652	1744672	+	n
TU_P_1740652_1752500	1740652	1752500	+	n
TU_P_1740652_1742385	1740652	1742385	+	n
TU_P_1747696_1751267	1747696	1751267	+	y
TU_P_1751241_1752500	1751241	1752500	+	y
TU_M_1753221_1755574	1753221	1755574	-	n
TU_M_1755575_1755703	1755575	1755703	-	y
TU_P_1756028_1762713	1756028	1762713	+	y
TU_P_1758371_1762713	1758371	1762713	+	y
TU_M_1762726_1762960	1762726	1762960	-	y
TU_M_1762990_1764007	1762990	1764007	-	y
TU_P_1764030_1764130	1764030	1764130	+	y
TU_M_1764181_1765943	1764181	1765943	-	n
TU_M_1764181_1765123	1764181	1765123	-	y
TU_M_1765990_1779905	1765990	1779905	-	n
TU_M_1779914_1780794	1779914	1780794	-	n
TU_P_1781326_1783047	1781326	1783047	+	y
TU_M_1782820_1795028	1782820	1795028	-	y
TU_M_1792390_1796122	1792390	1796122	-	n
TU_P_1796150_1800265	1796150	1800265	+	y
TU_M_1799919_1804141	1799919	1804141	-	n
TU_M_1804164_1804325	1804164	1804325	-	y
TU_M_1804326_1806272	1804326	1806272	-	y
TU_M_1804616_1806272	1804616	1806272	-	y
TU_M_1806274_1806979	1806274	1806979	-	n
TU_M_1807011_1808501	1807011	1808501	-	y
TU_M_1808585_1815539	1808585	1815539	-	y
TU_M_1814289_1815539	1814289	1815539	-	y
TU_P_1815719_1827025	1815719	1827025	+	y
TU_P_1817396_1825217	1817396	1825217	+	y
TU_P_1825220_1827025	1825220	1827025	+	n
TU_M_1827028_1835089	1827028	1835089	-	y
TU_M_1830681_1833781	1830681	1833781	-	n
TU_M_1833782_1835089	1833782	1835089	-	y
TU_M_1835253_1836615	1835253	1836615	-	n
TU_M_1836659_1839175	1836659	1839175	-	n
TU_P_1839441_1840496	1839441	1840496	+	y
TU_M_1840381_1840696	1840381	1840696	-	y
TU_M_1840820_1844830	1840820	1844830	-	n
TU_M_1844797_1848824	1844797	1848824	-	y
TU_M_1846510_1847812	1846510	1847812	-	y
TU_M_1847812_1848824	1847812	1848824	-	y
TU_M_1848964_1855523	1848964	1855523	-	y
TU_M_1848964_1857443	1848964	1857443	-	n
TU_P_1857385_1858650	1857385	1858650	+	y
TU_M_1858188_1861600	1858188	1861600	-	n
TU_P_1861615_1863586	1861615	1863586	+	y
TU_M_1863120_1864361	1863120	1864361	-	y
TU_P_1864519_1867171	1864519	1867171	+	y
TU_P_1864820_1867171	1864820	1867171	+	n
TU_M_1866854_1867813	1866854	1867813	-	y
TU_P_1867849_1869435	1867849	1869435	+	y
