# Supplementary material for: The Genome Organization of Thermotoga maritima Reflects Its Lifestyle
Source: PLoS Genet. 2013 Apr 25;9(4):e1003485. doi: 10.1371/journal.pgen.1003485 (PMC3636130; doi:10.1371/journal.pgen.1003485)
Supplement: Table S5 — Putative ncRNAs. (XLSX) [file pgen.1003485.s009.xlsx]

## Sheet: TableS5
Table S5. Putative ncRNAs.
Transcribed Region ID	Left Coordinate	Right Coordinate	Strand	Length	Exp. Identified TSS (y/n)	FPKM Value				Conditions with FPKM>8	notes
						Log Phase	Heat Shock	Carbon Limited Late Exponential	Hydrogen Inhibited
RTS_M_140472_140565	140472	140565	-	94	y	61952.6	1057.62	109250	15464.8	4	pncRNA
RTS_P_1478497_1478746	1478497	1478746	+	250	y	14490.4	13055.4	67669.7	20598.5	4	two pORF's
RTS_M_423730_423900	423730	423900	-	171	y	4930.06	2630.56	1964.04	564.426	4	pncRNA intergenic
RTS_M_689396_689469	689396	689469	-	74	y	1450.79	1245.83	0	530.537	3	pncRNA intergenic
RTS_P_1204073_1204157	1204073	1204157	+	85	y	652.448	43.3713	333.277	206.676	4	pncRNA intergenic
RTS_M_1060608_1060738	1060608	1060738	-	131	n	621.198	161.447	623.57	1257.94	4	pORF
RTS_P_360972_361136	360972	361136	+	165	n	467.664	655.752	198.467	640.183	4	pORFs (one or two)
RTS_M_1755704_1755851	1755704	1755851	-	148	y	417.323	711.769	565.828	456.718	4	pORF
RTS_M_934685_934868	934685	934868	-	184	y	243.478	689.147	11437.8	433.762	4	pncRNA intergenic
RTS_P_534213_534327	534213	534327	+	115	y	109.098	141.883	146.803	322.407	4	inside annoted gene
RTS_M_1206715_1207094	1206715	1207094	-	380	y	61.0124	27.1981	94.2816	63.0844	4	pncRNA intergenic
RTS_M_1060496_1060607	1060496	1060607	-	112	n	60.4249	5.21796	5.34024	176.046	2	pncRNA intergenic
RTS_P_1864422_1864518	1864422	1864518	+	97	n	6.942	9.54685	8.39893	35.7616	3	pncRNA
